# Supplementary material for: Brief communication: PICOP, a new ocean melt parameterization under ice shelves combining PICO and a plume model
Source: Copernicus journal article supplement (doi:10.5194/tc-13-1043-2019), 2019-04-01
Supplement: Supplementary file 1 [file tc-13-1043-2019-supplement.zip]

Archive with 3 entries (3 files):
- PicopMeltRateFields_1km.zip
- tc-13-1043-2019-supplement-title-page.pdf
- supplement.pdf
