# Supplementary material for: Brief communication: PICOP, a new ocean melt parameterization under ice shelves combining PICO and a plume model
Source: Copernicus journal article supplement (doi:10.5194/tc-13-1043-2019), 2019-04-01
Supplement: Supplementary file 1 [file tc-13-1043-2019-supplement.zip › supplement.pdf]

*Supplement of*

**Brief communication: PICOP, a new ocean melt parameterization under ice shelves combining PICO and a plume model**

Pelle et al.

Modeled basal melting rates computed by PICOP are available for the Amundsen Sea Sector of the West Antarctic Ice Sheet, the Totten and Moscow University ice shelves of the East Antarctic Ice Sheet, and the Filchner-Ronne ice shelf. Melt rates are in units of  $\text{m yr}^{-1}$  and have been interpolated onto a standard  $1 \text{ km} \times 1 \text{ km}$  grid.
