# Supplementary material for: Brief communication: PICOP, a new ocean melt parameterization under ice shelves combining PICO and a plume model
Source: Copernicus journal article supplement (doi:10.5194/tc-13-1043-2019), 2019-04-01
Supplement: Supplementary file 1 [file tc-13-1043-2019-supplement.zip › tc-13-1043-2019-supplement-title-page.pdf]

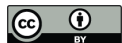

## *Supplement of*

# **Brief communication: PICOP, a new ocean melt parameterization under ice shelves combining PICO and a plume model**

**Tyler Pelle et al.**

*Correspondence to:* Tyler Pelle ([tpelle@uci.edu](mailto:tpelle@uci.edu))

- [tc-13-1043-2019-supplement-title-page.pdf](#)
- [PicopMeltRateFields\\_1km.zip](#)
- [supplement.pdf](#)

The copyright of individual parts of the supplement might differ from the CC BY 4.0 License.
